# Supplementary material for: Pathologic tau conformer ensembles induce dynamic, liquid-liquid phase separation events at the nuclear envelope
Source: PubMed Central journal article supplement (PMC8428099; doi:10.1186/s12915-021-01132-y), 2021-09-09

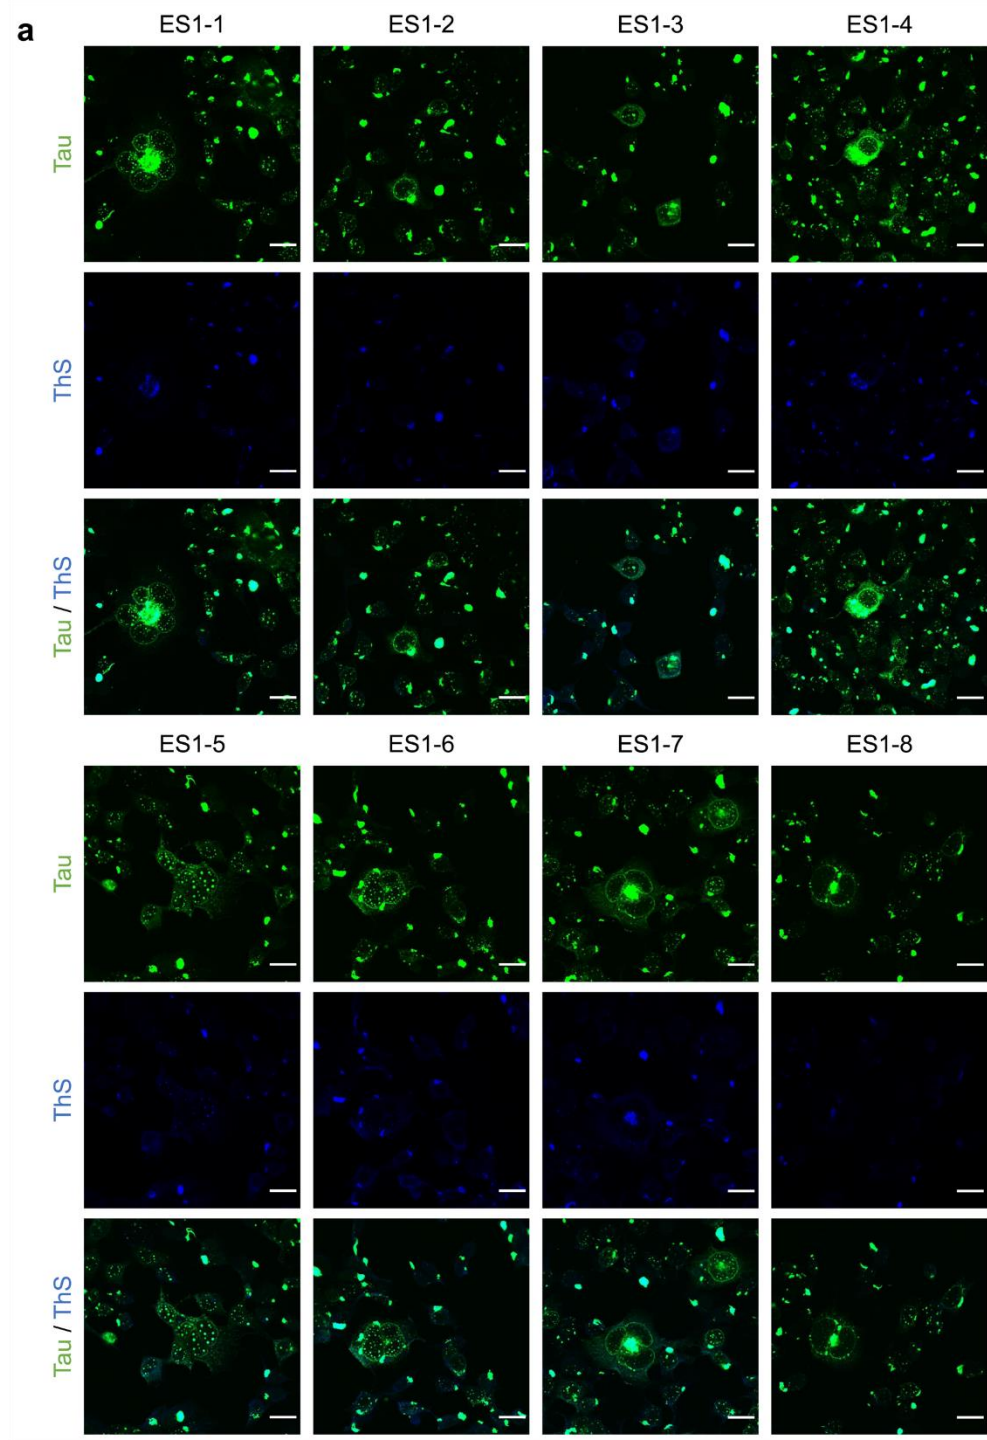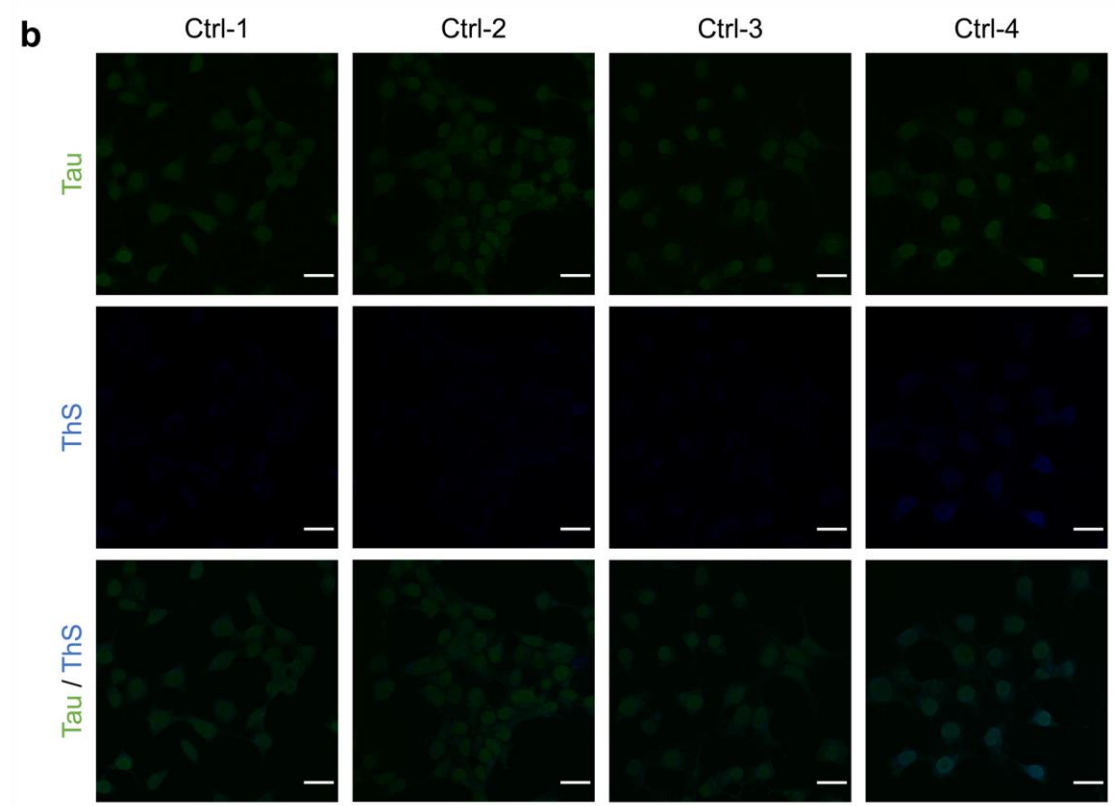

Supplement: 12915_2021_1132_MOESM3_ESM.pdf [file 12915_2021_1132_MOESM3_ESM.pdf]
